# Supplementary material
Source: PubMed Central journal article supplement (PMC7456604)

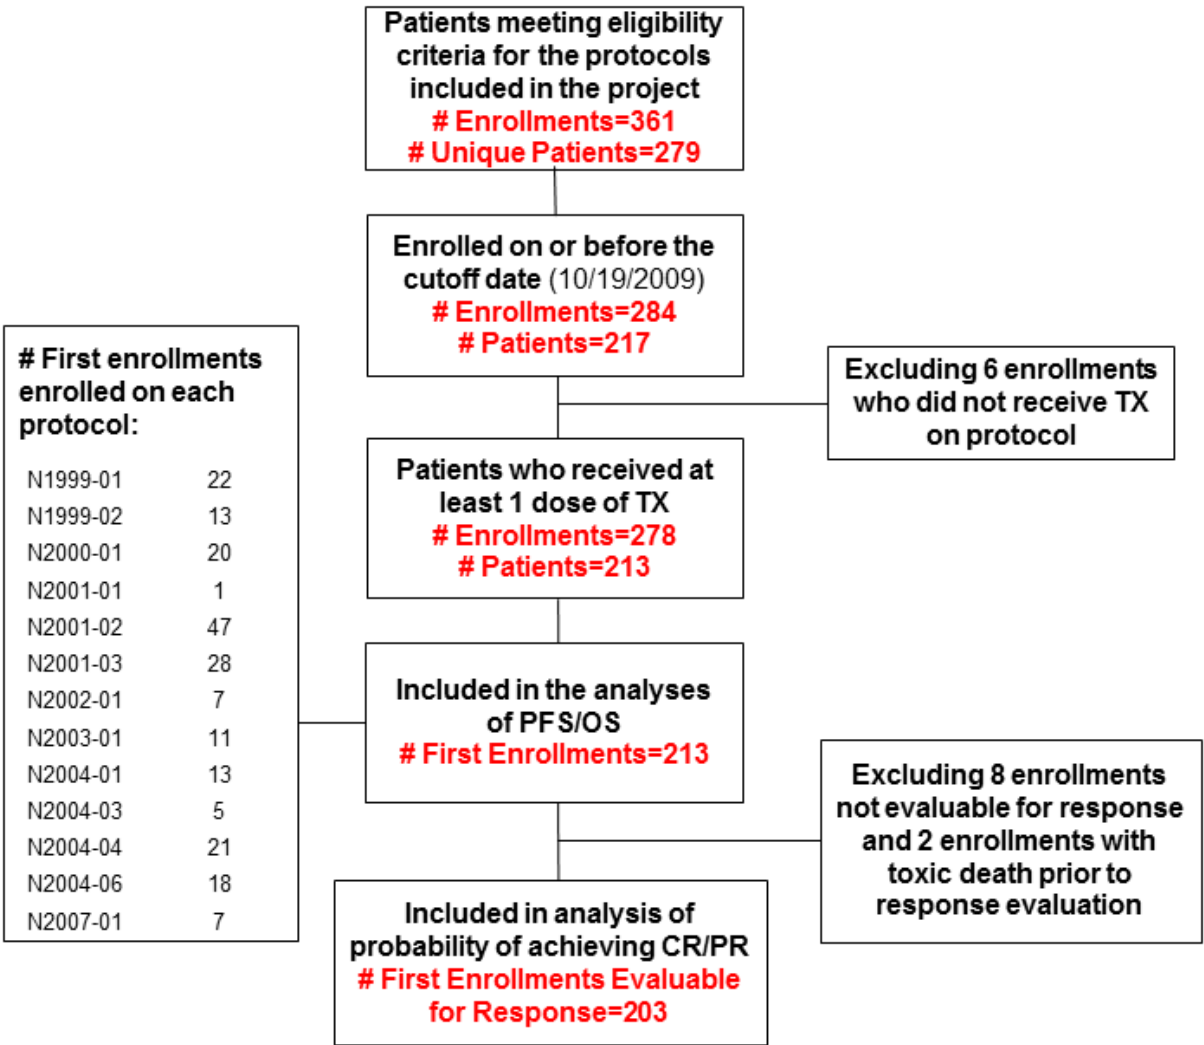

Supplement: NIHMS978286-supplement-Figure_S1.pdf [file NIHMS978286-supplement-Figure_S1.pdf]
